# Supplementary material for: Solvent induced conformational polymorphism
Source: Royal Society of Chemistry journal article supplement (doi:10.1039/d2ce01681h), 2023-01-01
Supplement: d2ce01681h1.pdf [file d2ce01681h1.pdf]

## Solvent induced conformational polymorphism

Konrad Dyk<sup>1</sup>, Vasyl Kinzhybalo<sup>2</sup>, Grzegorz Czernel<sup>3</sup>, Wojciech Grudziński<sup>4</sup>, Yuriy Horak<sup>5</sup>, Serhii Butenko<sup>5</sup> and Daniel M. Kamiński<sup>1\*</sup>

<sup>1</sup>Institute of Chemical Sciences, Maria Curie-Skłodowska University, pl. Marii Curie-Skłodowskiej 3, 20-031 Lublin, Poland

<sup>2</sup>Institute of Low Temperature and Structure Research, Polish Academy of Sciences, Okólna 2 str., 50-422 Wrocław, Poland

<sup>3</sup>Department of Biophysics, University of Life Sciences in Lublin, Akademicka 13, 20-950 Lublin, Poland

<sup>4</sup>Institute of Physics, Maria Curie-Skłodowska University, pl. Marii Curie-Skłodowskiej 1, 20-031 Lublin, Poland

<sup>5</sup>Ivan Franko National University of Lviv, Kyryla I Mefodiya St. 6, 79005 Lviv, Ukraine

## Supplementary

**Synthesis of 2,5-Bis(3-bromophenyl)furan.** A solution of sodium nitrite (6.38 g, 92.5 mmol) in H<sub>2</sub>O (14 ml) was added dropwise to the stirred mixture of 3-bromoaniline 14.4 g (83.7 mmol), concentrated HCl (36%, 0.3 mol, 30 ml), and H<sub>2</sub>O (15 ml) at a temperature below +5°C. The cold solution was filtrated and the diazonium salt was slowly added to a vigorously stirred solution of 2-furoic acid (4.6 g, 41.0 mmol) and CuCl<sub>2</sub>·2H<sub>2</sub>O (1.0 g, 5.9 mmol) in acetone (70 ml) at the room temperature. The rate of addition was controlled by the nitrogen and carbon dioxide evolution (3–4 bubbles/sec, 0.5–1 h). At the end of the reaction, after the evolution of nitrogen and carbon dioxide ceased, water (200 ml) was added, extracted with CH<sub>2</sub>Cl<sub>2</sub>, washed with 10% K<sub>2</sub>CO<sub>3</sub> (2×200 ml), and H<sub>2</sub>O (3×200 ml), and the organic layers were dried with anhyd. Na<sub>2</sub>SO<sub>4</sub> concentrated and purified by column chromatography (eluent hexane). Yield 23% (3.56 g).

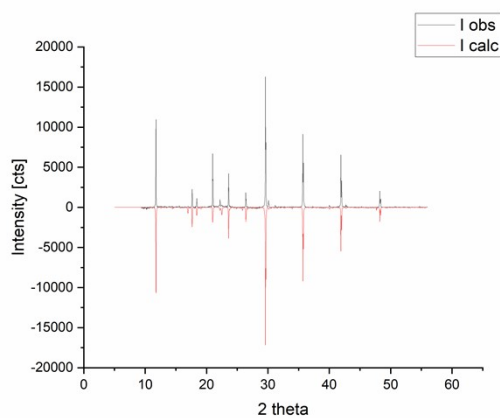

A) EtOH Form  $\alpha$ ;  $\beta$  43%

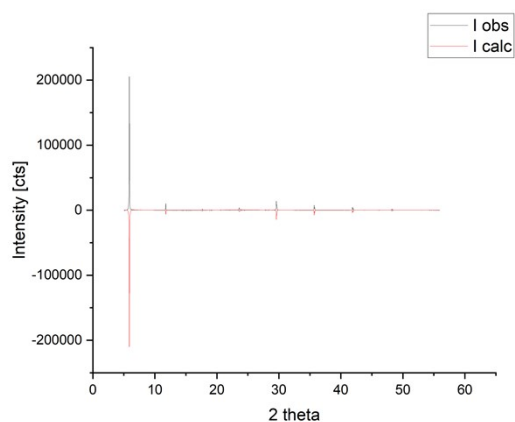

B) ACN form  $\beta$

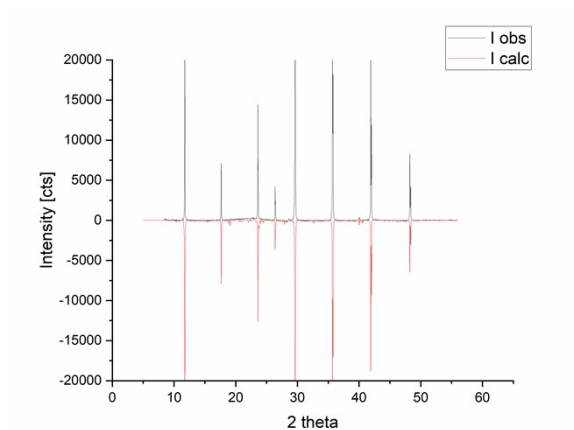

C) EtOH Form  $\alpha$  7%;  $\beta$  93%

S. Figure 1. PXRDs of fast crystallization on glass from A) & C) ethanol; B) acetonitrile. Grey-intensity observed, red-intensity calculated from the structural data.

$\alpha$

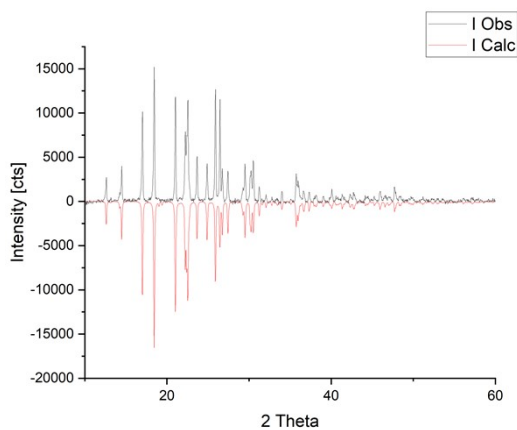

$\beta$

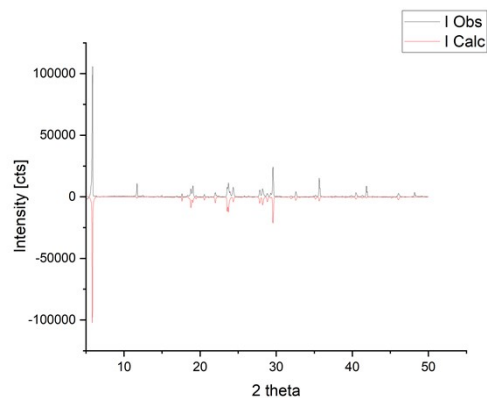

$\gamma$

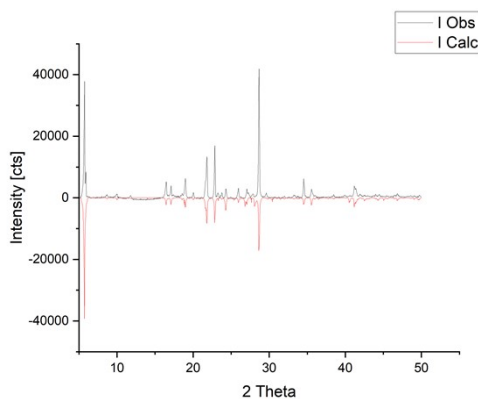

S. Figure 2. The PXR of the polymorphs structures of the MBPF. Grey-intensity observed, red-intensity calculated from the structural data.

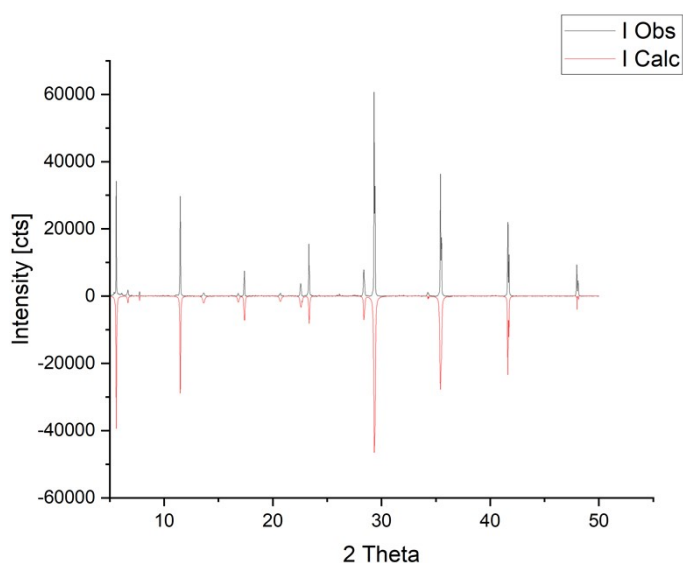

**S. Figure 3.** PXRD of the sample after crystallization from the vapor. The diffractograms indicates presents of forms  $\beta$  and  $\gamma$  with dominant phase  $\gamma$ .

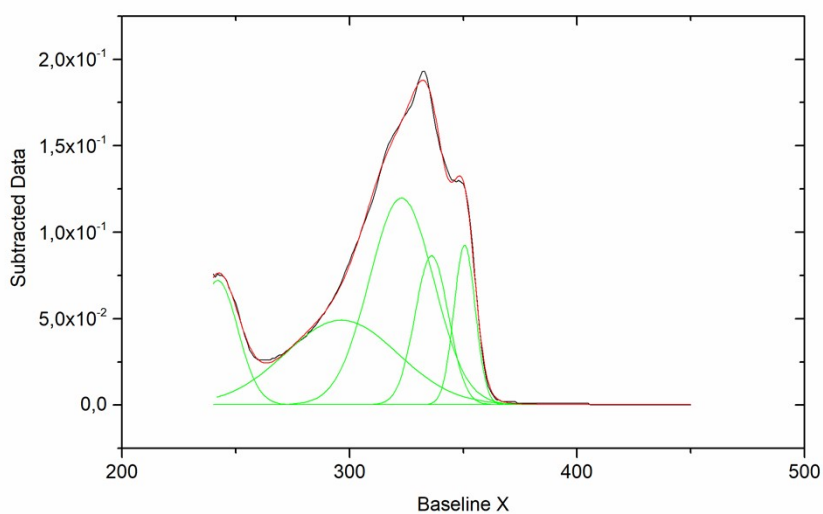

**Fitting Results**

| Peak Index | Peak Type | Area Intg | FWHM     | Max Height | Center Crvty | Area IntgP |
|------------|-----------|-----------|----------|------------|--------------|------------|
| 1          | Gaussian  | 0,94668   | 20,97637 | 0,07173    | 242,0516     | 8,73709    |
| 2          | Gaussian  | 2,99134   | 58,27469 | 0,04877    | 296,43641    | 27,6077    |
| 3          | Gaussian  | 4,23335   | 33,31587 | 0,11937    | 322,82795    | 39,07049   |
| 4          | Gaussian  | 1,57976   | 17,25641 | 0,086      | 336,1115     | 14,57996   |
| 5          | Gaussian  | 1,08403   | 11,05644 | 0,09211    | 350,59085    | 10,00475   |

**S. Figure 4.** UV-Vis spectra of the **MBPF** from chloroform and its decomposition. The component at 322 and 336 nm correspond to monomers. The component at 350 nm corresponds to dimers.

**S. Table 1.** Crystal17 calculations of the crystal net energies for studied polymorphs using different basis sets and structure optimization.

| $E_{total}$ [kJ] | $E_{mol D}$ [kJ] | $E_{mol noD}$ [kJ] | $E_{mol cpc}$ [kJ] | BSSE [kJ] | Form |
|------------------|------------------|--------------------|--------------------|-----------|------|
|------------------|------------------|--------------------|--------------------|-----------|------|

**DZVP**

|                                                              |              |              |              |             |          |
|--------------------------------------------------------------|--------------|--------------|--------------|-------------|----------|
| -61302025,59                                                 | -15325134,36 | -15324947,36 | -15325136,74 | 189,3832338 |          |
| Z                                                            | 4            |              |              |             |          |
| <b><math>E_{\text{coh Bartolomeo}} = -372,0361295</math></b> |              |              |              |             | $\alpha$ |
| <b><math>E_{\text{coh+BSSE}} = -182,6528956</math></b>       |              |              |              |             |          |
| -61302905,8                                                  | -15325283,45 | -15325097    | -15325360,46 | 263,4596354 |          |
| Z                                                            | 4            |              |              |             |          |
| <b><math>E_{\text{coh Bartolomeo}} = -442,9998668</math></b> |              |              |              |             | $\beta$  |
| <b><math>E_{\text{coh+BSSE}} = -179,5402314</math></b>       |              |              |              |             |          |
| -61302027,08                                                 | -15325132,4  | -15324945,71 | -15325139,42 | 193,711696  |          |
| Z                                                            | 4            |              |              |             |          |
| <b><math>E_{\text{coh Bartolomeo}} = -374,367502</math></b>  |              |              |              |             | $\gamma$ |
| <b><math>E_{\text{coh+BSSE}} = -180,6558059</math></b>       |              |              |              |             |          |

**TZVP**

|                                                              |              |              |              |             |          |
|--------------------------------------------------------------|--------------|--------------|--------------|-------------|----------|
| -61317490,65                                                 | -15329049,25 | -15328862,24 | -15329010,12 | 147,878497  |          |
| Z                                                            | 4            |              |              |             |          |
| <b><math>E_{\text{coh Bartolomeo}} = -323,4132546</math></b> |              |              |              |             | $\alpha$ |
| <b><math>E_{\text{coh+BSSE}} = -175,5347576</math></b>       |              |              |              |             |          |
| -61318075,1                                                  | -15329194,42 | -15329007,97 | -15329161,45 | 153,4765996 |          |
| Z                                                            | 4            |              |              |             |          |
| <b><math>E_{\text{coh Bartolomeo}} = -324,3599133</math></b> |              |              |              |             | $\beta$  |
| <b><math>E_{\text{coh+BSSE}} = -170,8833137</math></b>       |              |              |              |             |          |
| -61317491,03                                                 | -15329047,6  | -15328860,91 | -15329011,07 | 150,1674073 |          |
| Z                                                            | 4            |              |              |             |          |
| <b><math>E_{\text{coh Bartolomeo}} = -325,1592254</math></b> |              |              |              |             | $\gamma$ |
| <b><math>E_{\text{coh+BSSE}} = -174,9918181</math></b>       |              |              |              |             |          |

**Optimization - TZVP**

|                                                              |              |              |              |              |          |
|--------------------------------------------------------------|--------------|--------------|--------------|--------------|----------|
| -61321672,73                                                 | -15329761,33 | -15329576,05 | -15328988,26 | -587,7957436 |          |
| Z                                                            | 4            |              |              |              |          |
| <b><math>E_{\text{coh Bartolomeo}} = -656,8497117</math></b> |              |              |              |              | $\alpha$ |
| <b><math>E_{\text{coh+BSSE}} = -1244,645455</math></b>       |              |              |              |              |          |
| -61321725,09                                                 | -15329761,78 | -15329576,72 | -1,53E+07    | -584,321125  |          |
| Z                                                            | 4            |              |              |              |          |
| <b><math>E_{\text{coh Bartolomeo}} = -669,4925044</math></b> |              |              |              |              | $\beta$  |
| <b><math>E_{\text{coh+BSSE}} = -1253,813629</math></b>       |              |              |              |              |          |
| -61321729,37                                                 | -15329761,77 | -15329576,77 | -15329011,08 | -565,695114  |          |
| Z                                                            | 4            |              |              |              |          |
| <b><math>E_{\text{coh Bartolomeo}} = -670,5760767</math></b> |              |              |              |              | $\gamma$ |
| <b><math>E_{\text{coh+BSSE}} = -1236,27119</math></b>        |              |              |              |              |          |
